# Supplementary material
Source: Royal Society of Chemistry journal article supplement (doi:10.1039/d6nj00288a)
Supplement: d6nj00288a1.pdf [file d6nj00288a1.pdf]

## Supporting Information

### **Hydrophobic porphyrin MOFs and its catalytic characteristic on CL-20 by promoting decomposition.**

*Taihe Wang<sup>a,b,1</sup>, Chengling Zou<sup>a</sup>, Yu Li<sup>a</sup>, Yuxin Mu<sup>a</sup>, Jiale Wei<sup>a</sup>, Chao Chen<sup>b</sup>, Yan Zhang<sup>b</sup>, Haijian Li<sup>b,\*</sup>, Jianhua Yi<sup>b,\*</sup>, Haixia Ma<sup>a,c,\*</sup>, Fengqi Zhao<sup>b,\*</sup>*

T. H. Wang, C. L. Zou, Y. Li, Y. X. Mu, J. L. Wei, Prof. H. X. Ma

<sup>a</sup> Xi'an Key Laboratory of Special Energy Materials, School of Chemical Engineering, Northwest University, Xi'an 710069, China

C. Chen, Y. Zhang, Prof. H. J. Li, Prof. J. H. Yi, Prof. H. X. Ma, F. Q. Zhao

<sup>b</sup> National Key laboratory of Energetic Materials, Xi'an Modern Chemistry Research Institute, Xi'an 710065, China

<sup>c</sup> Zhijian Laboratory, Xi'an 710025, China

\*Corresponding authors:

H. Li (E-mail: [h.j.li@outlook.com](mailto:h.j.li@outlook.com)), H. Yi (E-mail: [npecc\\_yjh2819@163.com](mailto:npecc_yjh2819@163.com));

H. Ma (E-mail: [mahx@nwu.edu.cn](mailto:mahx@nwu.edu.cn)), F. Zhao (E-mail: [npecc@163.com](mailto:npecc@163.com))

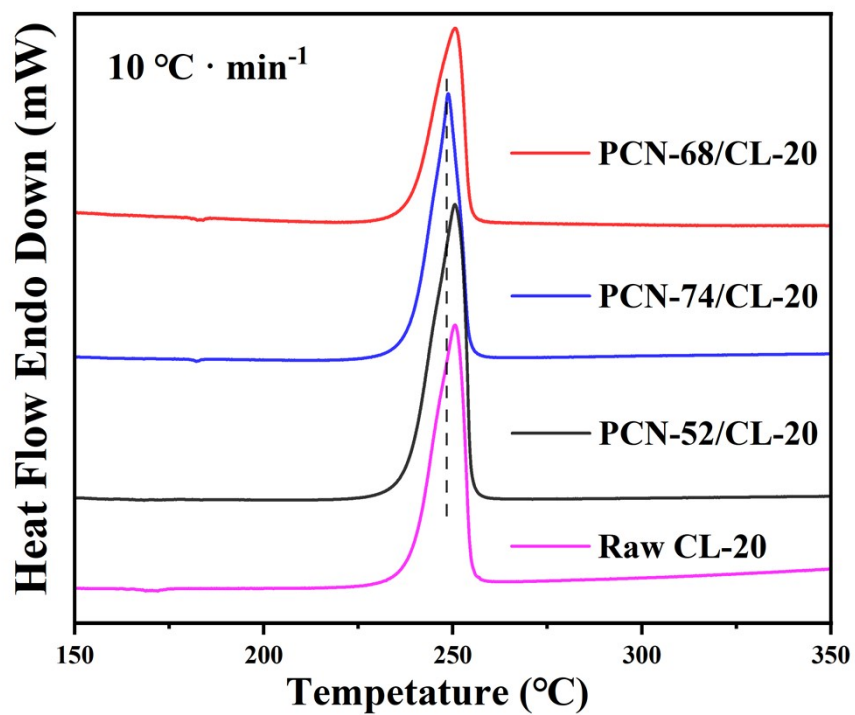

**Fig. S1** DSC curves of PCN-74/CL-20, PCN-68/CL-20 PCN-54/CL-20 and raw CL-20 at the heating rate of 10 °C · min<sup>-1</sup>.

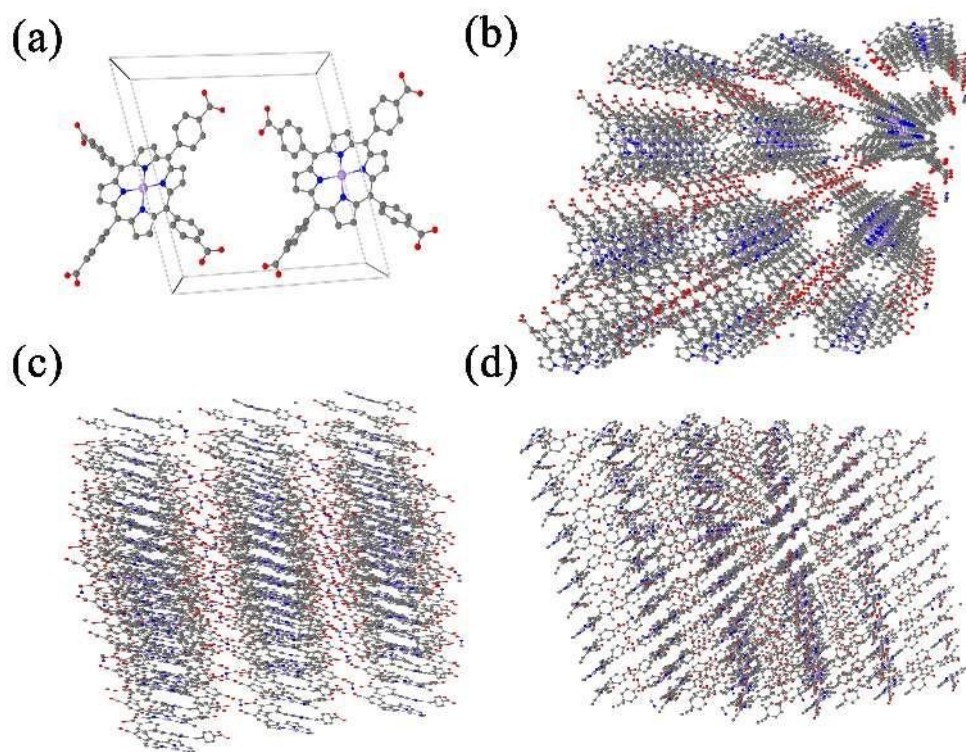

**Fig. S2.** (a), (b), (c), (d) The different direction view of PCN-74

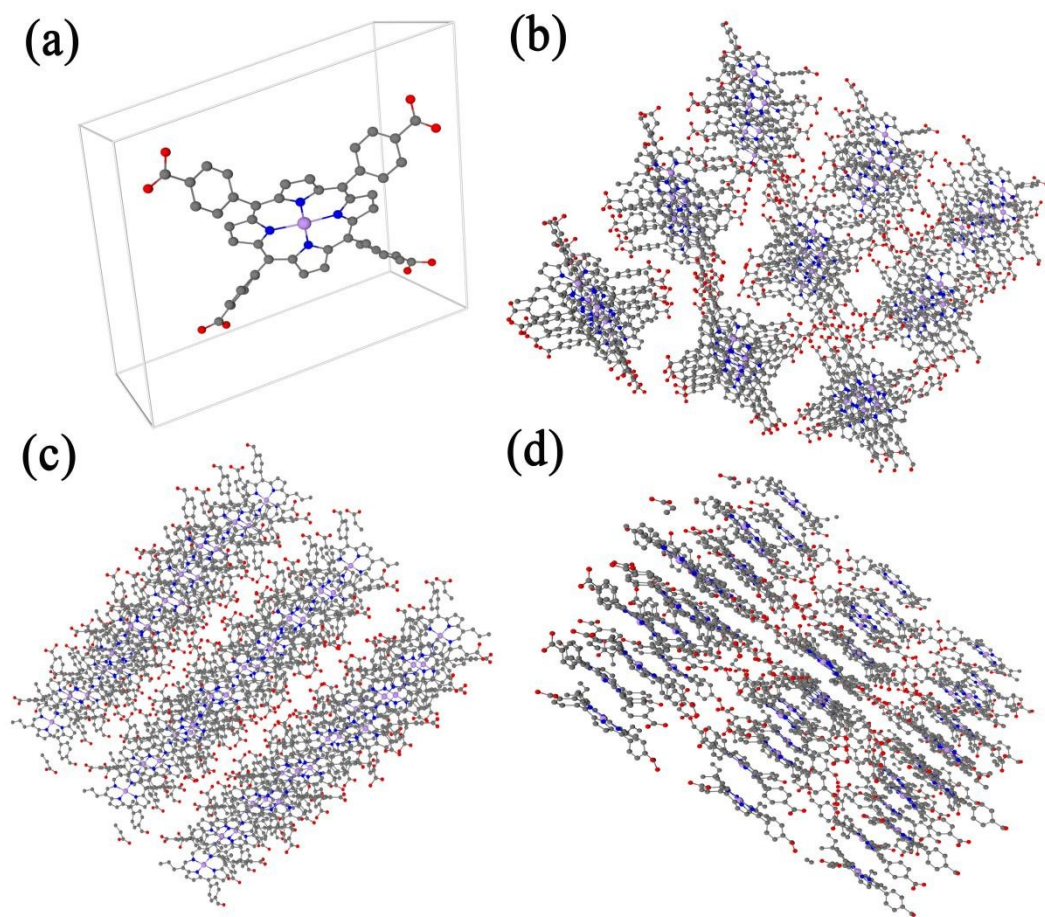

**Fig. S2.** (a), (b), (c), (d) The different direction view of PCN-68.

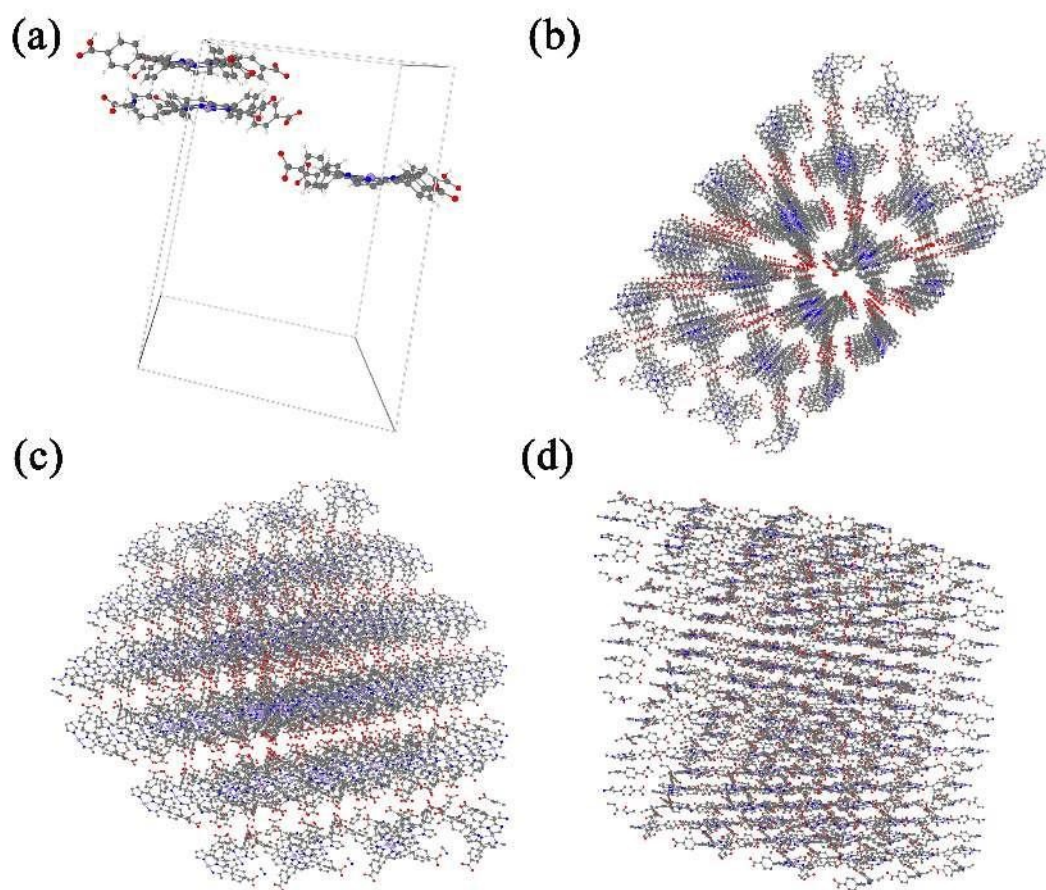

**Fig. S4.** (a), (b), (c), (d) The different direction view of PCN-52

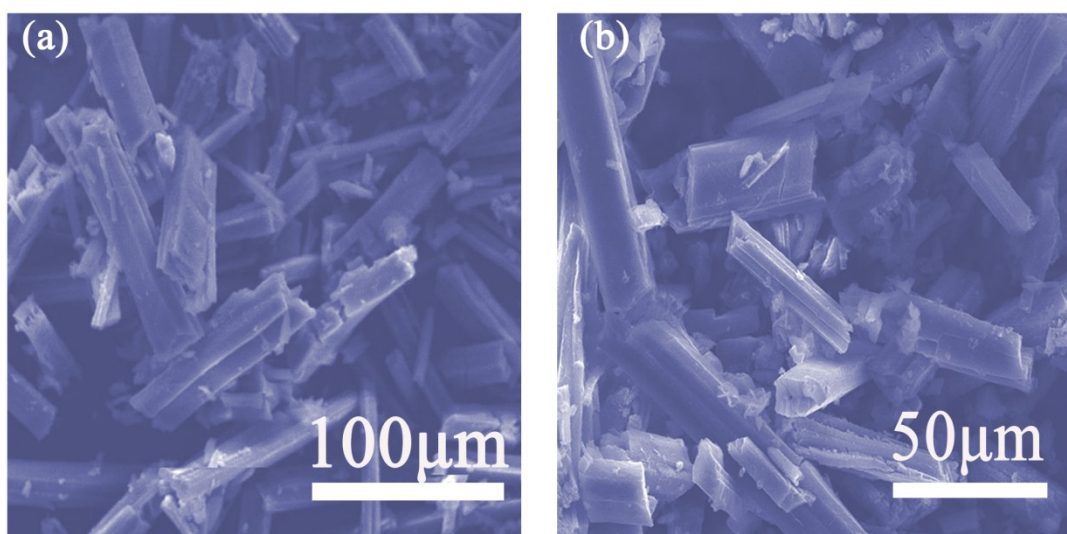

**Fig. S5.** Different resolution SEM images of (a), (b) PCN-74

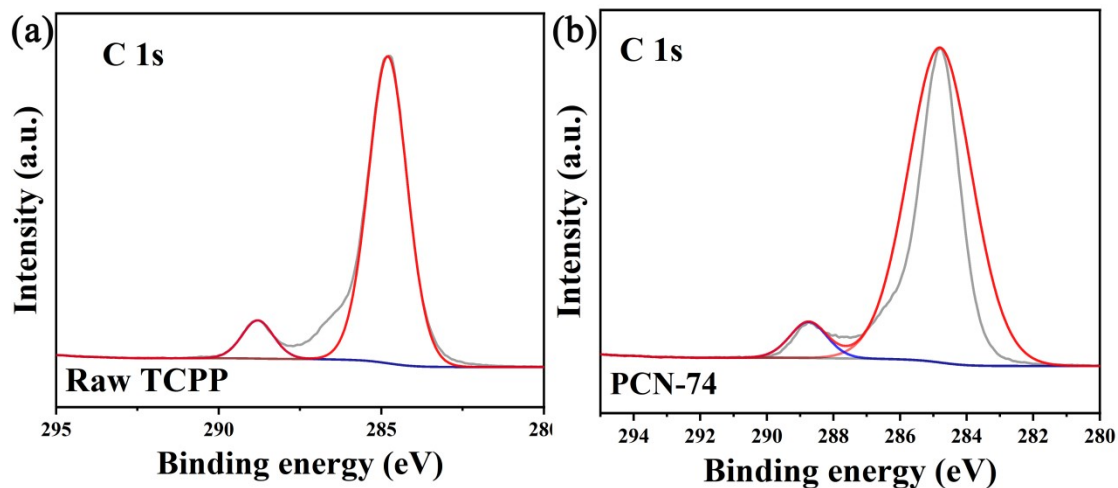

**Fig. S6.**High-resolution XPS survey spectra of C 1s

**Table S1** Assignment of the XPS peaks for Rude TCPP and TCPP Cu MOFs

| Samples          | XPS peaks (eV) | Assignment              | Reference |
|------------------|----------------|-------------------------|-----------|
| Raw TCPP         | 288.83         | C 1s (sample C)         |           |
|                  | 533.40, 531.86 | O 1s (C-OH,C=O)         | 1         |
|                  | 399.70, 397.49 | N 1s (C=N,C-N)          | 2         |
| PCN-74           | 288.71         | C 1s (sample C)         |           |
|                  | 533.43, 531.86 | O 1s (C-OH,C=O)         | 3         |
|                  | 399.71, 398.30 | N 1s (C=N,N-Cu)         | 3,4       |
|                  | 932.71, 953.4  | Cu 2p(Cu <sup>+</sup> ) | 4,5       |
|                  | 934.54, 954.42 | Cu 2p(Cu <sup>+</sup> ) |           |
| 939.6 and 943.91 | Satellite      |                         |           |

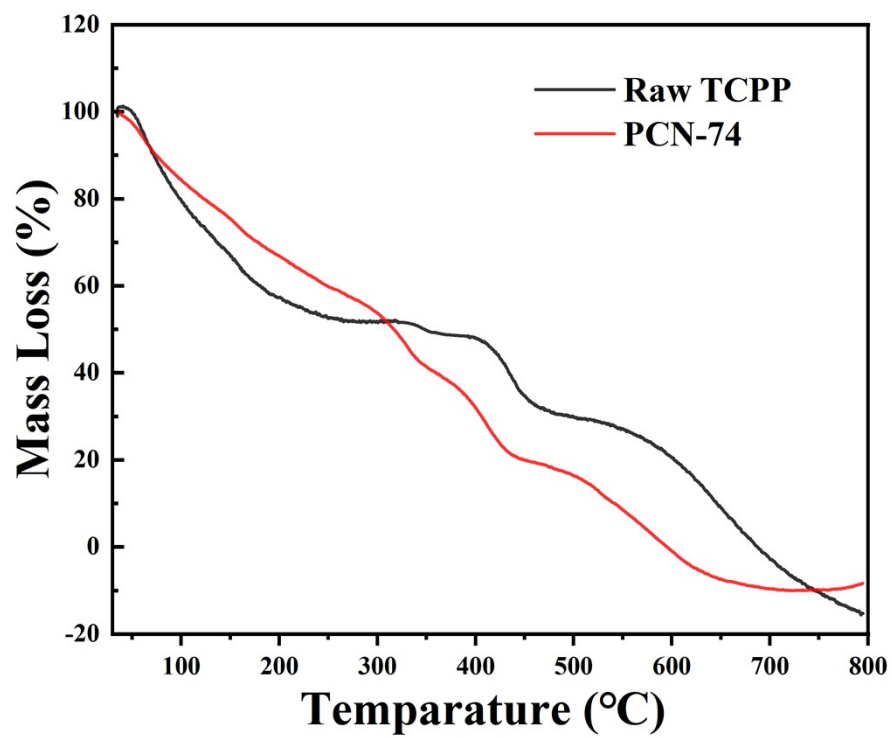

Fig. S7. TG curves of TCPP and PCN-74 at a heating rate of  $10\text{ }^{\circ}\text{C}\cdot\text{min}^{-1}$

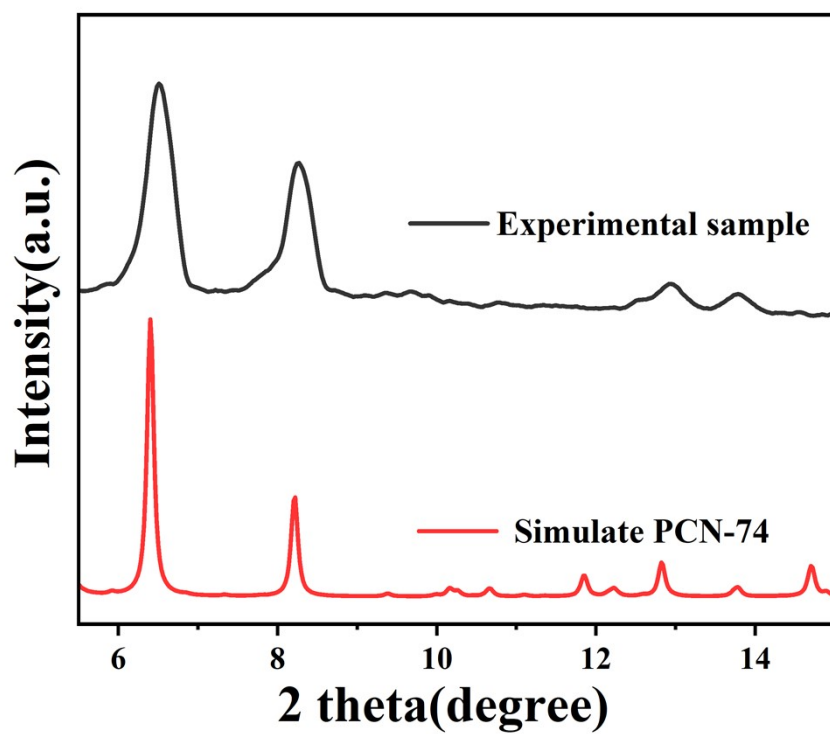

**Fig.S8.** The zoomed-in PXRD patterns of the PCN-74

**Table. S2 Thermolysis peak temperatures and heat release.**

| Samples      | $\beta/^\circ\text{C}\cdot\text{min}^{-1}$ | $T_0/^\circ\text{C}$ | $T_1/^\circ\text{C}$ | $\Delta H/\text{J}\cdot\text{g}^{-1}$ |
|--------------|--------------------------------------------|----------------------|----------------------|---------------------------------------|
| CL-20        | 2.5                                        | 170.86               | 235.5                | 2783                                  |
|              | 5                                          | 171.33               | 243.3                | 2730                                  |
|              | 7.5                                        | 171.63               | 248.4                | 3097                                  |
|              | 10                                         | 171.88               | 251.2                | 2429                                  |
| PCN-74/CL-20 | 2.5                                        | 180.81               | 233.8                | 2201                                  |
|              | 5                                          | 181.79               | 242.5                | 4052                                  |
|              | 7.5                                        | 182.83               | 248.9                | 2277                                  |
|              | 10                                         | 183.7                | 250.8                | 2366                                  |

**Table. S3 A comparison of the molar ratio of decomposition gaseous products**

|                          | <b>Gas production ration(%)</b> |                                                       |                                 |                          |             |                                  |                                               |                          |
|--------------------------|---------------------------------|-------------------------------------------------------|---------------------------------|--------------------------|-------------|----------------------------------|-----------------------------------------------|--------------------------|
|                          | 28<br>(N <sub>2</sub> /CO)      | 16(O <sup>+</sup> /<br>NH <sub>2</sub> <sup>+</sup> ) | 17<br>(NH <sub>3</sub> /<br>OH) | 18<br>(H <sub>2</sub> O) | 27<br>(HCN) | 30<br>(CH <sub>2</sub> O/<br>NO) | 44<br>(CO <sub>2</sub> /<br>N <sub>2</sub> O) | 46<br>(NO <sub>2</sub> ) |
| <b>CL-20</b>             | 34.6824                         | 2.6581                                                | 2.8024                          | 8.8058                   | 22.2038     | 17.5666                          | 6.3750                                        | 4.0915                   |
| <b>PCN-74<br/>/CL-20</b> | 25.9947                         | 2.7207                                                | 3.3868                          | 12.5956                  | 19.2663     | 24.1913                          | 9.4995                                        | 1.6503                   |

In the laser ignition experiment, the PCN-74/CL-20 mixture was put in the cylindrical crucible. The sample mass is about 28-33mg. Each sample was subjected to at least four repeated parallel tests at different power densities. Due to the high sensitivity of CL-20, the mixture was only gotten some slight shaking to ensure safety. Its geometry is close to the cylindrical container.

**Table. S4.** The ignition delay time of CL-20 at different laser powder density.

| <b>CL-20</b>                                  |                                  |                                  |                                  |                                  |                |                 |
|-----------------------------------------------|----------------------------------|----------------------------------|----------------------------------|----------------------------------|----------------|-----------------|
| <b>Laser Power Density (W/cm<sup>2</sup>)</b> | <b>Ignition delay time 1(ms)</b> | <b>Ignition delay time 2(ms)</b> | <b>Ignition delay time 3(ms)</b> | <b>Ignition delay time 4(ms)</b> | <b>Avg(ms)</b> | <b>S.D.(ms)</b> |
| 130.86634                                     | 173                              | 176                              | 175                              | 170                              | 173.5          | 2.64575         |
| 191.71925                                     | 98                               | 95                               | 97                               | 96                               | 96.5           | 1.29099         |
| 252.57217                                     | 91                               | 92                               | 94                               | 90                               | 91.5           | 1.70783         |
| 275                                           | 83                               | 80                               | 82                               | 85                               | 82.5           | 2.08167         |
| 323.56723                                     | 82                               | 79                               | 82                               | 83                               | 81.5           | 1.73205         |

**Table. S5.** The ignition delay time of CL-20 at different laser powder density.

| <b>PCN-74/CL-20</b>                           |                                  |                                  |                                  |                                  |                |                 |
|-----------------------------------------------|----------------------------------|----------------------------------|----------------------------------|----------------------------------|----------------|-----------------|
| <b>Laser Power Density (W/cm<sup>2</sup>)</b> | <b>Ignition delay time 1(ms)</b> | <b>Ignition delay time 2(ms)</b> | <b>Ignition delay time 3(ms)</b> | <b>Ignition delay time 4(ms)</b> | <b>Avg(ms)</b> | <b>S.D.(ms)</b> |
| 70.01343                                      | 182                              | 185                              | 178                              | 188                              | 183.25         | 4.272           |
| 130.86634                                     | 82                               | 96                               | 88                               | 99                               | 91.25          | 7.71902         |
| 191.71925                                     | 59                               | 60                               | 62                               | 60                               | 60.25          | 1.25831         |
| 252.57217                                     | 59                               | 60                               | 56                               | 58                               | 58.25          | 1.70783         |
| 275                                           | 46                               | 49                               | 49                               | 48                               | 48             | 1.41421         |

**Table. S6.** Comparison of activation energy has been reported for catalytic CL-20.

| Sample                                                                                     | E/(kJ • mol <sup>-1</sup> ) | ΔE /(kJ • mol <sup>-1</sup> ) |
|--------------------------------------------------------------------------------------------|-----------------------------|-------------------------------|
| This work                                                                                  | 166.5                       | -13.5                         |
| 5% carbon nanotubes/CL-20 <sup>6</sup>                                                     | 172.2                       | -12.32                        |
| Cr <sub>2</sub> O <sub>3</sub> /CL-20 <sup>7</sup>                                         | 175.6                       | -9.6                          |
| ZnCo <sub>2</sub> O <sub>4</sub> (HCs)/CL-20 <sup>8</sup>                                  | 148.82                      | -6.23                         |
| MnO <sub>2</sub> /CL-20 <sup>9</sup>                                                       | 179.18                      | -8.42                         |
| 6%MOF-199/CL-20 <sup>10</sup>                                                              | 161.8                       | -8.8                          |
| PbBa-MOF/CL-20 <sup>11</sup>                                                               | 230.99                      | -23.76                        |
| NiBa-MOF/CL-20 <sup>11</sup>                                                               | 212.74                      | -42.01                        |
| ZIF-67/CL-20 <sup>12</sup>                                                                 | 179.08                      | -25.92                        |
| K <sub>2</sub> Ba[Ni(NO <sub>2</sub> ) <sub>6</sub> ]/ CL-20 <sup>13</sup>                 | 277.85                      | +88.32                        |
| Cu(1-MIM) <sub>2</sub> (N <sub>3</sub> ) <sub>2</sub> /CL-20 <sup>14</sup>                 | 186.1                       | -9                            |
| [Cu(1-VIM) <sub>2</sub> (N <sub>3</sub> ) <sub>2</sub> ] <sub>n</sub> /CL-20 <sup>14</sup> | 171.2                       | -23.9                         |
| nmT-Fe <sub>2</sub> O <sub>3</sub> /CL-20 <sup>15</sup>                                    | 177.84                      | -3.35                         |
| nmG-Fe <sub>2</sub> O <sub>3</sub> /CL-20 <sup>15</sup>                                    | 176.11                      | -5.08                         |
| nano-CuCr <sub>2</sub> O <sub>4</sub> /CL-20 <sup>16</sup>                                 | 230.3                       | -25.2                         |
| nano-NiCr <sub>2</sub> O <sub>4</sub> /CL-20 <sup>16</sup>                                 | 232.8                       | -23.7                         |
| nano-ZnCr <sub>2</sub> O <sub>4</sub> /CL-20 <sup>16</sup>                                 | 252.8                       | -2.7                          |

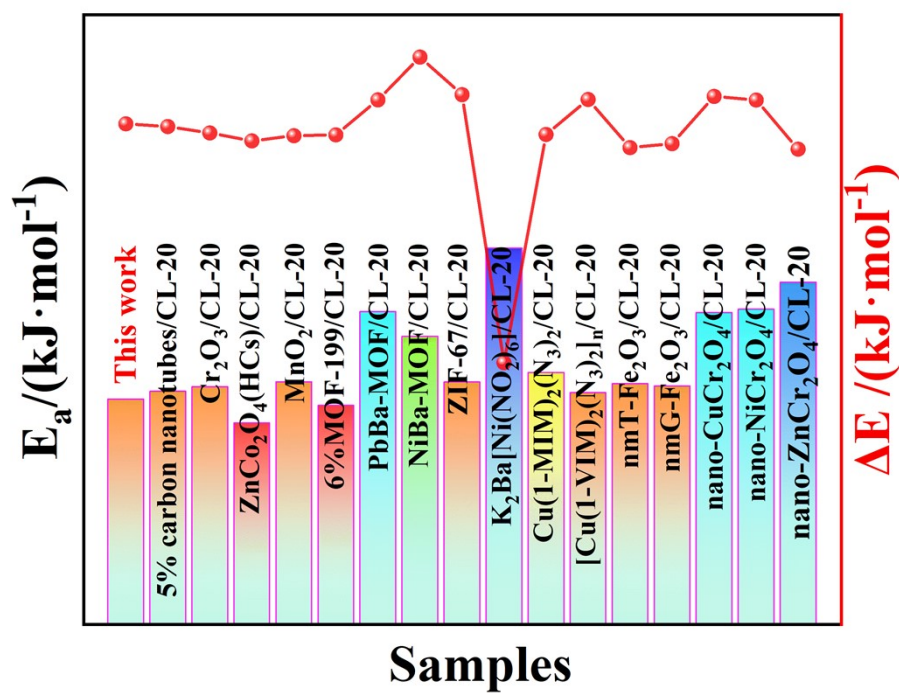

Fig. S9. Comparison of activation energy has been reported for catalytic CL-2

## Reference

- 1 M. Xu, X. Liu, Z. Zhao, L. Sun, L. Liu, J. Guo and J. Sha, *Chem. Eng. J.*, 2024, **491**, 152178.
- 2 J. Wang, Z. Song, M. He, Y. Qian, D. Wang, Z. Cui, Y. Feng, S. Li, B. Huang, X. Kong, J. Han and L. Wang, *Nat. Commun.*, 2024, **15**, 2125.
- 3 W. Bai, S. Li, J. Ma, W. Cao and J. Zheng, *J. Mater. Chem. A*, 2019, **7**, 9086–9098.
- 4 Y. Liu, Y. Wei, M. Liu, Y. Bai, X. Wang, S. Shang, C. Du, W. Gao, J. Chen and Y. Liu, *Adv. Mater.*, 2021, **33**, 2007741.
- 5 D. D. La, H. P. N. Thi, Y. S. Kim, A. Rananaware and S. V. Bhosale, *Appl. Surf. Sci.*, 2017, **424**, 145–150.
- 6 X. Yu, *Chin. J. Explos. & Propellants*, 2004, **27**, 78–80.
- 7 N. Zhao, H. Ma, E. Yao, T. An and F. Zhao, *Chin. J. Explos. & Propellants*, 2026, **49**, 45–54.
- 8 Y. Li, T. Zhang, C. Li, W. Wang, A. Pang, Z. Guo and H. Ma, *Chin. J. Energ. Mater.*
- 9 J. Liu, N. Zhao, F. Zhao, J. Song and H. Ma, *Chin. J. Explos. Propellants*, DOI:10.14077/j.issn.1007-7812.2015.02.004.
- 10 H. Li, W. Tong, Z. Yan, L. Li, S. Wang, J. Huo, L. Yang, J. Han, X. Ren and W. Li, *ACS Appl. Mater. Interfaces*, 2023, **15**, 41850–41860.
- 11 C. Chen, H. Li, J. Yi, Z. Qin, C. Wang, Z. Sun, Y. Xu, S. Xu and F. Zhao, *Mater. Today Chem.*, 2022, **23**, 100676.
- 12 X. Yang, B. Tan, B. Wang, L. Yao, X. Li, D. Zhao, W. Li, L. Cao, Y. Huang and X. Wang, *Molecules*, DOI:10.3390/molecules27238370.
- 13 C. Chen, H. Li, Z. Qin, C. Wang, Y. Xu, Z. Sun, S. Xu, J. Yi and F. Zhao, *J. Phys. Chem. Solids*, 2022, **161**, 110411.
- 14 H. Li, W. Zhang, Z. Wei, L. Xia, M. Long, Z. Li and T. Zhang, *Eur. J. Inorg. Chem.*, 2022, **2022**, e202200008.
- 15 R. Gao, N. Zhao, J. Liu, T. Zhang and H. Ma, *Propellants Explos. Pyrotech.*, 2016, **41**, 936–941.
- 16 Y. Wang, T. An, N. Yan, Z. Yan, B. Zhao and F. Zhao, *ACS Omega*, 2020, **5**, 327–333.
